# Supplementary material for: Functional validity, role, and implications of heavy alcohol consumption genetic loci
Source: PubMed Central journal article supplement (PMC6962045; doi:10.1126/sciadv.aay5034), 2020-01-15
Supplement: aay5034_SM.pdf [file aay5034_SM.pdf]

## Supplementary Materials for

### Functional validity, role, and implications of heavy alcohol consumption genetic loci

Andrew Thompson\*, James Cook, H el ene Choquet, Eric Jorgenson, Jie Yin, Tarja Kinnunen, Jeff Barclay,  
Andrew P. Morris, Munir Pirmohamed

\*Corresponding author. Email: [andrew.thompson@liverpool.ac.uk](mailto:andrew.thompson@liverpool.ac.uk)

Published 15 January 2020, *Sci. Adv.* **6**, eaay5034 (2020)  
DOI: 10.1126/sciadv.aay5034

#### The PDF file includes:

Supplementary Methods

Table S1. Summary of final multivariable logistic regression model.

Table S2. Summary of genome-wide significant SNPs following distance-based clumping on the UKB cohort, and the replication cohort and meta-analysis outcomes.

Legend for table S3

Table S4. LD between the top eQTL SNP for any eQTL signal and the GWAS SNP.

Table S5. Variant-trait significant outcomes from PheWAS.

Table S6. Variants at  $5 \times 10^{-6}$  and submitted to the Reactome Knowledgebase.

Table S7. Mendelian randomization results for nominally significant outcomes in the IVW analysis and FDR outcomes using the IVW method.

Fig. S1. LocusZoom plots for lead SNPs from GWAS on alcohol phenotype in the entire cohort.

Fig. S2. Constitutive signaling by aberrant PI3K in cancer.

Fig. S3. Individual *C. elegans*  $\beta$ -Klotho genes outcomes.

References (61–71)

#### Other Supplementary Material for this manuscript includes the following:

(available at [advances.sciencemag.org/cgi/content/full/6/3/eaay5034/DC1](https://advances.sciencemag.org/cgi/content/full/6/3/eaay5034/DC1))

Table S3 (.csv format). eQTL analysis outcomes.

## Supplementary Methods

### *UK alcohol units applied to each alcoholic drink in Uk Biobank cohort*

The number of units in each type of alcoholic drink was standardised using drink measure (provided by UK) and alcohol by volume data from various sources. Units were determined by multiplying the volume of the drink (in millilitres) by its percentage ABV, and dividing the outcome by 1000.

The units assigned to each drink (Beer/cider = 2.6; White wine = 1.5; Red wine = 1.5; Fortified wine = 1.1; Spirits = 1; Other = 1.5) were multiplied by the self-reported number of specific drinks consumed per week or per month and then summed across all types of drinks. Where information was only available on alcohol consumed per month, the summed data was multiplied by 12 (for months in a year) and then divided by 52 to obtain a measure comparable with weekly alcohol intake.

### *Replication phenotype and genetic analysis*

**Phenotype:** On the Research Program on Genes, Environment, and Health (RPGEH) survey, participants were asked regarding the past year: "On average, how many days a week do you have a drink containing alcohol?" (no days, 1 day, 2 days, 3 days, 4 days, 5 days, 6 days, or every day). Participants were also asked: "On a typical day that you drink, how many drinks do you have?" (none, 1, 2, 3, 4, 5, 6, 7, or  $\geq 8$ ). The regular quantity of alcohol drinks consumed per week was calculated for alcohol drinkers by multiplying the two answers. This drinks/week quantitative trait was then log-transformed prior to conducting genetic association analyses to address non-normality.

**Genotyping:** DNA samples from GERA individuals were extracted from Oragene kits (DNA Genotek Inc., Ottawa, ON, Canada) at KPNC and genotyped at the Genomics Core Facility of the University of California, San Francisco (UCSF). DNA samples were genotyped at over 665,000 single nucleotide polymorphisms (SNPs) on Affymetrix Axiom arrays (Affymetrix, Santa Clara, CA, USA) (47, 48). Genetic variants with initial genotyping call rate  $\geq 97\%$ , allele frequency difference  $\leq 0.15$  between males and females for autosomal markers, and genotype concordance rate  $> 0.75$  across duplicate samples were included (46). Around 94% of samples and more than 98% of genetic markers assayed passed quality control (QC) procedures. In addition to those QC criteria, SNPs with genotype call rates  $< 90\%$  were removed, as well as SNPs with a minor allele frequency (MAF)  $< 1\%$ .

**Imputation:** Following genotyping QC, we conducted statistical imputation of additional genetic variants. Following the pre-phasing of genotypes with Shape-IT v2.5 (61), variants were imputed from the cosmopolitan 1000 Genomes Project reference panel (phase I integrated release; <http://1000genomes.org>) using IMPUTE2 v2.3.1 (62). As a QC metric, we used the info  $r^2$  from IMPUTE2, which is an estimate of the correlation of the imputed genotype to the true genotype (63). Imputed genetic variants with info-metric  $r^2 \geq 0.9$  and  $MAF \geq 1\%$  were reported as previously described (12).

**GWAS Analysis.** Analyses were conducted using PLINK (64) v1.07 and R. A linear regression of each individual's drinks/week was performed with the following covariates: age at survey, sex, the top 10 ancestry principal components (PCs), and the percentage of Ashkenazi ancestry, as previously described (12). Eigenstrat (65) v4.2 was used to calculate the PCs (66). A linear regression of the

residuals on each SNP was then performed to assess genetic associations with drinks/week. Data from each SNP were modelled using additive dosages to account for the uncertainty of imputation (67).

### *Model Organisms – complete methods*

#### ***Nematode strains and culture***

*Caenorhabditis elegans* strains were grown at 20°C on nematode growth medium (NGM) agar plates using *Escherichia coli* OP50 as a food source (68). The following strains were used in this study: Bristol N2 (wild-type), K12G11.3 *sodh-1* (*ok2799*), FX04174 *hxx-1* (*tm4174*), TV13570 *nrx-1* (*wy778*), VC1881 *zip-15* (*ok2160*), VC2175 *klo-1* (*ok2925*), RB1549 *klo-2* (*ok1862*), TC446;*klo-2* (*ok1862*); *klo-1* (*ok2925*) (20) and NL2099 *rrf-3* (*pk1426*).

#### ***Behavioural assays***

Phenotypic experiments were performed at 20°C in a temperature-controlled room on young adult hermaphrodites selected from sparsely populated NGM plates. Locomotion rate was quantified by thrashing in Dent's solution (140 mM NaCl, 6 mM KCl, 1 mM CaCl<sub>2</sub>, 1 mM MgCl<sub>2</sub>, 5 mM HEPES, pH 7.4 with bovine serum albumin at 0.1 mg/ml) as previously described (59, 60). One thrash was defined as one complete movement from maximum to minimum amplitude and back. Ethanol was mixed with Dent's solution to produce the indicated concentrations. Phenotypic effects of ethanol were calculated as thrashes per minute following a 10 minute exposure and normalised as a percentage of mean thrashing rate of untreated worms measured each day. All data are expressed as mean ± S.E. 30 treated and untreated animals were analysed and compared per strain per experiment. Significance was assessed by one-way analysis of variance (ANOVA) with post-hoc Bonferroni correction for multiple comparisons.

#### ***RNA interference***

RNA interference experiments were performed on the *rrf-3* (*pk1426*) strain as previously described (60, 69). RNAi was achieved by feeding (70) using the ORFeome based RNAi library (71). In brief, the indicated HT115 RNAi bacterial clones were cultured in LB media with 100 µg/ml ampicillin and then spotted in three 50 µl drops on 60 mm diameter NGM plates containing 1 mM isopropyl β-1-thiogalactopyranoside (IPTG) and 25 µg/ml carbenicillin. RNAi plates were dried for at least 4 days before seeding to improve RNAi efficiency. Five L3-L4 worms were added to each RNAi plate and cultured at 20°C. Phenotypic analysis was performed on first-generation progeny fed with the indicated RNAi bacterial clones. For simultaneous RNAi of *klo-1* and *klo-2*, worms were fed both RNAi bacterial clones mixed at equal bacterial concentration quantified by OD600 absorbance. Phenotypic effects of ethanol were quantified as above and compared to RNAi feeding with an empty feeding vector. 30 treated and untreated animals were analysed and compared per strain per experiment.

**Table S1. Summary of final multivariable logistic regression model.**

| <b>Risk Factor</b>                                                | <b>OR</b> | <b>95% CI</b> | <b>P</b> |
|-------------------------------------------------------------------|-----------|---------------|----------|
| Sex                                                               | 2.50      | 2.42 – 2.59   | <0.0005  |
| Age at Recruitment                                                | 0.96      | 0.96 – 0.96   | <0.0005  |
| Property ownership<br>(own vs. rent)                              | 1.53      | 1.45 – 1.63   | <0.0005  |
| Smoking status<br>(anytime vs. never)                             | 3.22      | 3.11 – 3.32   | <0.0005  |
| Long-standing<br>illness, disability or<br>infirmity (yes vs. no) | 1.19      | 1.15 – 1.23   | <0.0005  |
| Townsend<br>deprivation index at<br>recruitment                   | 1.09      | 1.08 – 1.10   | <0.0005  |
| Adopted as a child<br>(yes vs. no)                                | 1.16      | 1.02 – 1.33   | 0.024    |
| BMI                                                               | 1.06      | 1.06 – 1.06   | <0.0005  |

**Table S2. Summary of genome-wide significant SNPs following distance-based clumping on the UKB cohort, and the replication cohort and meta-analysis outcomes.**

| Chr | Position  | Lead SNP    | Locus          | UK Biobank  |              |       |                     |          | GERA (replication) |          | Meta-analysis |          |
|-----|-----------|-------------|----------------|-------------|--------------|-------|---------------------|----------|--------------------|----------|---------------|----------|
|     |           |             |                | Risk Allele | Other Allele | RAF   | OR (95%CI)          | P        | BETA (SE)          | P        | Z-score       | P        |
| 2   | 27730940  | rs1260326   | <i>GCKR</i>    | C           | T            | 0.612 | 1.06<br>(1.04-1.08) | 2.60E-08 | 0.033 (0.029)      | 1.12E-06 | 7.391         | 1.46E-13 |
| 4   | 39422242  | rs13130794  | <i>KLB</i>     | T           | C            | 0.632 | 1.07<br>(1.05-1.09) | 2.60E-10 | 0.035 (0.007)      | 4.20E-07 | 8.096         | 5.67E-16 |
| 4   | 99713350  | rs144198753 | <i>BTF3P13</i> | C           | T            | 0.991 | 1.66<br>(1.48-1.85) | 2.70E-18 | 0.156 (0.023)      | 2.12E-11 | 10.994        | 4.10E-29 |
| 4   | 100239319 | rs1229984   | <i>ADH1B</i>   | C           | T            | 0.980 | 1.58<br>(1.48-1.70) | 3.30E-36 | 0.187 (0.016)      | 2.91E-32 | 17.209        | 2.27E-66 |
| 4   | 102456330 | rs76062146  | <i>BANK1</i>   | G           | A            | 0.972 | 1.19<br>(1.12-1.27) | 1.90E-08 | 0.027 (0.020)      | 0.1866   | 5.193         | 2.07E-07 |
| 4   | 103188709 | rs13107325  | <i>SLC39A8</i> | C           | T            | 0.928 | 1.12<br>(1.08-1.16) | 1.60E-08 | 0.029 (0.013)      | 0.0249   | 5.798         | 6.70E-09 |
| 11  | 121501406 | rs10790449  | <i>SORL1</i>   | C           | T            | 0.463 | 1.06<br>(1.04-1.08) | 1.70E-08 | 0.002 (0.007)      | 0.8032   | 4.532         | 5.84E-06 |
| 16  | 53809123  | rs55872725  | <i>FTO</i>     | C           | T            | 0.599 | 1.06<br>(1.04-1.09) | 3.60E-09 | 0.008 (0.007)      | 0.2491   | 5.305         | 1.13E-07 |
| 17  | 43751913  | rs1635291   | <i>CRHR1</i>   | A           | G            | 0.754 | 1.08<br>(1.05-1.10) | 4.50E-10 | 0.019 (0.008)      | 0.1258   | 5.803         | 6.52E-09 |

**Table S3. eQTL analysis outcomes.**

Table provided separately

**Table S4. LD between the top eQTL SNP for any eQTL signal and the GWAS SNP.**

| Lead SNP from UK Biobank and replicated in GERA | eQTL gene symbol | Implicated tissue                                                                                                                                                                                                                                                                                                                                  | Lead SNP for eQTL gene | R2 between SNPs |
|-------------------------------------------------|------------------|----------------------------------------------------------------------------------------------------------------------------------------------------------------------------------------------------------------------------------------------------------------------------------------------------------------------------------------------------|------------------------|-----------------|
| rs13130794                                      | RFC1             | <ul style="list-style-type: none"> <li>Brain - Cerebellar Hemisphere</li> <li>Muscle - Skeletal</li> </ul>                                                                                                                                                                                                                                         | rs3736168              | 0.372           |
| rs13130794                                      | UGDH             | <ul style="list-style-type: none"> <li>Whole Blood</li> </ul>                                                                                                                                                                                                                                                                                      | rs3172642              | 0.072           |
| rs1260326                                       | AC074117.10      | <ul style="list-style-type: none"> <li>Brain - Cerebellum</li> <li>Cells - Transformed fibroblasts</li> <li>Brain - Cerebellar Hemisphere</li> </ul>                                                                                                                                                                                               | rs7602534              | 0.4626          |
| rs1260326                                       | ATRAID           | <ul style="list-style-type: none"> <li>Cells - Transformed fibroblasts</li> </ul>                                                                                                                                                                                                                                                                  | rs1978881              | 0.1391          |
| rs1260326                                       | FNDC4            | <ul style="list-style-type: none"> <li>Thyroid</li> </ul>                                                                                                                                                                                                                                                                                          | rs814295               | 0.0942          |
| rs1260326                                       | GCKR             | <ul style="list-style-type: none"> <li>Thyroid</li> </ul>                                                                                                                                                                                                                                                                                          | rs6718128              | 0.0921          |
| rs1260326                                       | KRTCAP3          | <ul style="list-style-type: none"> <li>Adrenal Gland</li> <li>Muscle - Skeletal</li> </ul>                                                                                                                                                                                                                                                         | rs1647285              | 0.4912          |
| rs1260326                                       | NRBP1            | <ul style="list-style-type: none"> <li>Skin - Sun Exposed (Lower leg)</li> <li>Skin - Not Sun Exposed (Suprapubic)</li> <li>Adipose - Subcutaneous</li> <li>Small Intestine - Terminal Ileum</li> <li>Whole Blood</li> <li>Artery - Tibial</li> <li>Colon - Transverse</li> <li>Nerve - Tibial</li> <li>Cells - Transformed fibroblasts</li> </ul> | rs2303370              | 0.6074          |
| rs1260326                                       | PPM1G            | <ul style="list-style-type: none"> <li>Muscle - Skeletal</li> </ul>                                                                                                                                                                                                                                                                                | rs11904779             | 0.4807          |
| rs1260326                                       | SNX17            | <ul style="list-style-type: none"> <li>Muscle - Skeletal</li> </ul>                                                                                                                                                                                                                                                                                | rs7566052              | 0.473           |
| rs11214609                                      | TTC12            | <ul style="list-style-type: none"> <li>Muscle - Skeletal</li> <li>Esophagus - Gastroesophageal Junction</li> <li>Esophagus - Muscularis</li> <li>Skin - Sun Exposed (Lower leg)</li> <li>Skin - Not Sun Exposed (Suprapubic)</li> <li>Lung</li> <li>Heart - Left Ventricle</li> <li>Colon - Transverse</li> </ul>                                  | rs2236709              | 0.0015          |

|            |               |                                                                                                                                                                                                                                                                                                                                                                                                                                                                                                                                    |            |        |
|------------|---------------|------------------------------------------------------------------------------------------------------------------------------------------------------------------------------------------------------------------------------------------------------------------------------------------------------------------------------------------------------------------------------------------------------------------------------------------------------------------------------------------------------------------------------------|------------|--------|
|            |               | <ul style="list-style-type: none"> <li>• Artery - Tibial</li> <li>• Nerve - Tibial</li> <li>• Adipose - Subcutaneous</li> <li>• Heart - Atrial Appendage</li> <li>• Thyroid</li> <li>• Esophagus - Mucosa</li> <li>• Colon - Sigmoid</li> <li>• Adipose - Visceral (Omentum)</li> <li>• Breast - Mammary Tissue</li> <li>• Artery - Aorta</li> <li>• Stomach</li> <li>• Pituitary</li> <li>• Pancreas</li> <li>• Whole Blood</li> <li>• Brain - Frontal Cortex (BA9)</li> <li>• Brain - Cortex</li> <li>• Adrenal Gland</li> </ul> |            |        |
| rs11214609 | ANKK1         | <ul style="list-style-type: none"> <li>• Nerve - Tibial</li> <li>• Whole Blood</li> <li>• Lung</li> <li>• Testis</li> <li>• Muscle - Skeletal</li> <li>• Colon - Sigmoid</li> <li>• Adipose - Subcutaneous</li> <li>• Adipose - Visceral (Omentum)</li> <li>• Thyroid</li> <li>• Pancreas</li> <li>• Heart - Atrial Appendage</li> <li>• Heart - Left Ventricle</li> <li>• Colon - Transverse</li> </ul>                                                                                                                           | rs10891544 | 0.4733 |
| rs11214609 | RP11-159N11.4 | <ul style="list-style-type: none"> <li>• Skin - Not Sun Exposed (Suprapubic)</li> <li>• Esophagus - Muscularis</li> <li>• Lung</li> <li>• Nerve - Tibial</li> </ul>                                                                                                                                                                                                                                                                                                                                                                | rs3897583  | 0.0035 |

**Table S5. Variant-trait significant outcomes from PheWAS.**

| SNP        | SNP locus      | Trait                                                                      | P-value                  |
|------------|----------------|----------------------------------------------------------------------------|--------------------------|
| rs1229984  | <i>ADH1B</i>   | F10 Mental and behavioural disorders due to use of alcohol                 | 1.29 x 10 <sup>-19</sup> |
|            |                | E78 Disorders of lipoprotein metabolism and other lipidaemias              | 1.44 x 10 <sup>-7</sup>  |
|            |                | I10-I15 Hypertensive diseases                                              | 1.44 x 10 <sup>-7</sup>  |
|            |                | I10 Essential (primary) hypertension                                       | 1.89 x 10 <sup>-7</sup>  |
|            |                | F10-F19 Mental and behavioural disorders due to psychoactive substance use | 3.40 x 10 <sup>-7</sup>  |
|            |                | M10 Gout                                                                   | 8.83 x 10 <sup>-7</sup>  |
|            |                | E70-E90 Metabolic disorders                                                | 3.08 x 10 <sup>-6</sup>  |
|            |                | K70 Alcoholic liver disease                                                | 1.12 x 10 <sup>-5</sup>  |
|            |                |                                                                            |                          |
| rs1260326  | <i>GCKR</i>    | E78 Disorders of lipoprotein metabolism and other lipidaemias              | 7.63 x 10 <sup>-17</sup> |
|            |                | M10 Gout                                                                   | 3.72 x 10 <sup>-14</sup> |
|            |                | E70-E90 Metabolic disorders                                                | 3.59 x 10 <sup>-12</sup> |
|            |                | K80-K87 Disorders of gallbladder, biliary tract and pancreas               | 9.08 x 10 <sup>-12</sup> |
|            |                | K80 Cholelithiasis                                                         | 1.25 x 10 <sup>-11</sup> |
|            |                | E10-E14 Diabetes mellitus                                                  | 1.42 x 10 <sup>-10</sup> |
|            |                | E11 Non-insulin-dependent diabetes mellitus                                | 2.51 x 10 <sup>-10</sup> |
|            |                | I20-I25 Ischaemic heart diseases                                           | 1.39 x 10 <sup>-5</sup>  |
|            |                |                                                                            |                          |
| rs13107325 | <i>SLC39A8</i> | M15-M19 Arthrosis                                                          | 9.03 x 10 <sup>-8</sup>  |
|            |                | M75 Shoulder lesions                                                       | 5.04 x 10 <sup>-7</sup>  |
|            |                | M13 Other arthritis                                                        | 8.83 x 10 <sup>-7</sup>  |
|            |                | M20-M25 Other joint disorders                                              | 3.14 x 10 <sup>-6</sup>  |
|            |                | I10 Essential (primary) hypertension                                       | 4.01 x 10 <sup>-6</sup>  |
|            |                | I10-I15 Hypertensive diseases                                              | 4.13 x 10 <sup>-6</sup>  |
|            |                | K44 Diaphragmatic hernia                                                   | 1.08 x 10 <sup>-5</sup>  |



**Table S6. Variants at  $5 \times 10^{-6}$  and submitted to the Reactome Knowledgebase.**

| locus        | SNP         | P        |
|--------------|-------------|----------|
| ADH1B        | rs1229984   | 3.30E-36 |
| KLB          | rs13130794  | 2.60E-10 |
| CRHR1        | rs1635291   | 4.50E-10 |
| FTO          | rs55872725  | 3.60E-09 |
| SLC39A8      | rs13107325  | 1.60E-08 |
| SORL1        | rs10790449  | 1.70E-08 |
| BANK1        | rs76062146  | 1.90E-08 |
| GCKR         | rs1260326   | 2.60E-08 |
| FBXO11       | rs4952896   | 6.80E-08 |
| RP11-89K21.1 | rs1004787   | 2.00E-07 |
| DRD2         | rs11214609  | 2.10E-07 |
| DNAH7        | rs62203362  | 8.40E-07 |
| DCC          | rs113986473 | 9.20E-07 |
| TCF4         | rs117316028 | 9.50E-07 |
| SUGCT        | rs78619948  | 1.10E-06 |
| MED22        | rs621907    | 1.10E-06 |
| PTPRE        | rs12217409  | 1.20E-06 |
| DNAH5        | rs6874349   | 1.30E-06 |
| RUNX1T1      | rs17747233  | 1.30E-06 |
| NOX4         | rs12285366  | 1.60E-06 |
| BANK1        | rs201081507 | 1.70E-06 |
| AC006159.3   | rs12673233  | 1.70E-06 |
| FAIM2        | rs7132908   | 1.90E-06 |
| LRRTM4       | rs35525922  | 1.90E-06 |
| DGKQ         | rs61757581  | 2.00E-06 |
| CPQ          | rs1075479   | 2.10E-06 |
| DENND1A      | rs4838060   | 2.20E-06 |
| NRXN3        | rs78668413  | 3.20E-06 |
| TLK2         | rs143310582 | 3.40E-06 |
| ESR1         | rs35882398  | 3.40E-06 |

|           |             |          |
|-----------|-------------|----------|
| CCDC88A   | rs141392636 | 3.50E-06 |
| FMNL2     | rs11692786  | 3.60E-06 |
| PCTP      | rs187671201 | 3.80E-06 |
| ELTD1     | rs188522508 | 3.90E-06 |
| LINC00877 | rs139430561 | 4.00E-06 |
| MLF2      | rs2286729   | 4.50E-06 |
| GRM3      | rs192141105 | 4.60E-06 |

**Table S7. Mendelian randomization results for nominally significant outcomes in the IVW analysis and FDR outcomes using the IVW method.**

| <b>Outcome</b>                    | <b>B</b> | <b>se</b> | <b>P-value (IVW)</b> | <b>FDR P-value</b> |
|-----------------------------------|----------|-----------|----------------------|--------------------|
| Ischaemic stroke                  | -63.87   | 18.43     | 0.0005               | 0.0485             |
| Insulin sensitivity index         | -3.53    | 1.37      | 0.0098               | 0.3126             |
| AUC insulin                       | 2.91     | 1.19      | 0.0145               | 0.3126             |
| Lung adenocarcinoma               | 1.81     | 0.76      | 0.0168               | 0.3126             |
| Incremental insulin at 30 minutes | 3.03     | 1.31      | 0.0212               | 0.3126             |
| Nucleus accumbens volume          | -91.59   | 40.00     | 0.0220               | 0.3126             |
| Extreme waist-to-hip ratio        | -5.18    | 2.31      | 0.0252               | 0.3126             |
| Putamen volume                    | -449.85  | 203.65    | 0.0272               | 0.3126             |
| Eczema                            | -1.19    | 0.59      | 0.0429               | 0.3593             |
| Lung cancer                       | 1.04     | 0.52      | 0.0450               | 0.3593             |
| Transferrin                       | -1.52    | 0.76      | 0.0468               | 0.3593             |
| Insulin at 30 minutes             | 2.28     | 1.16      | 0.0495               | 0.3593             |

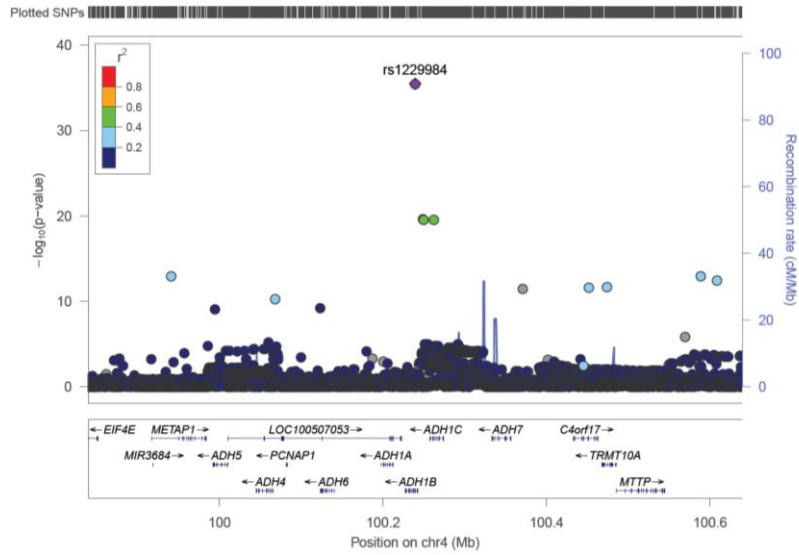

Figure S1a: LocusZoom plot for rs1229984

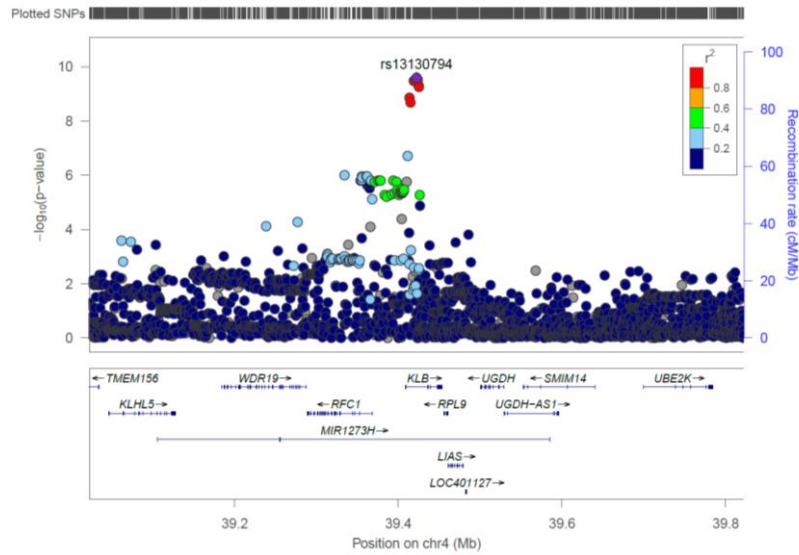

Figure S1b: LocusZoom plot for rs13130794

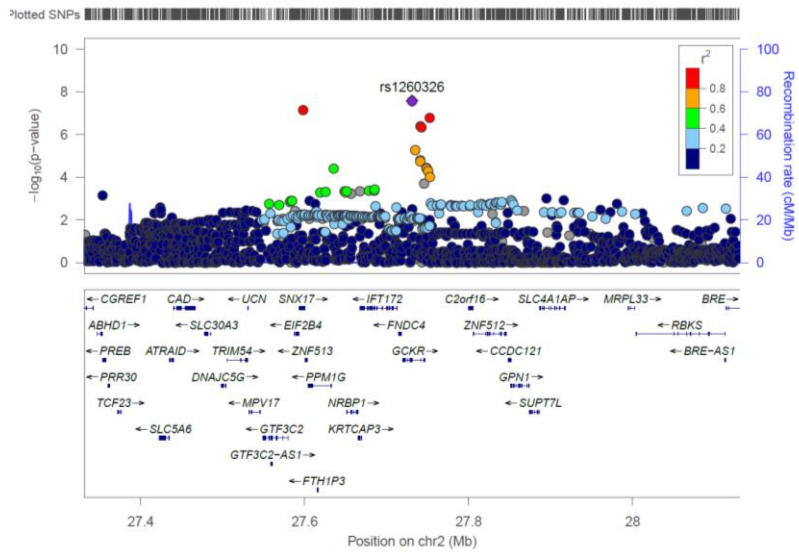

Figure S1c: LocusZoom plot for rs1260326

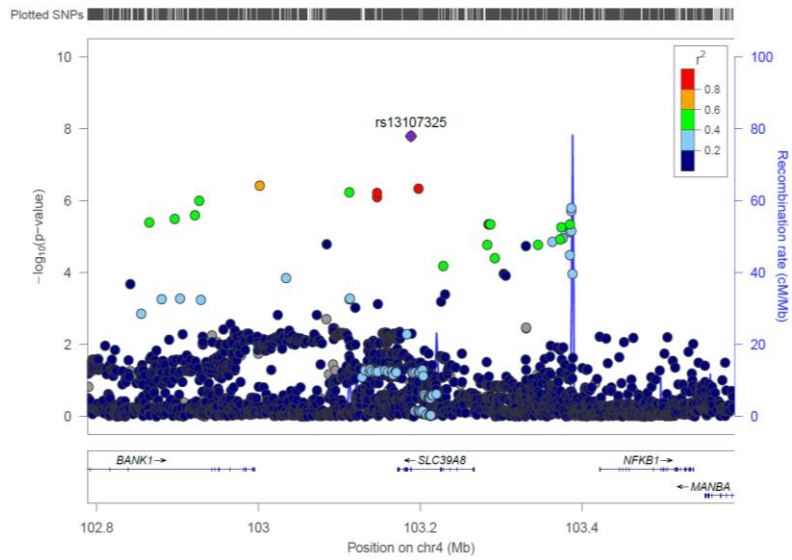

Figure S1d: LocusZoom plot for rs13107325

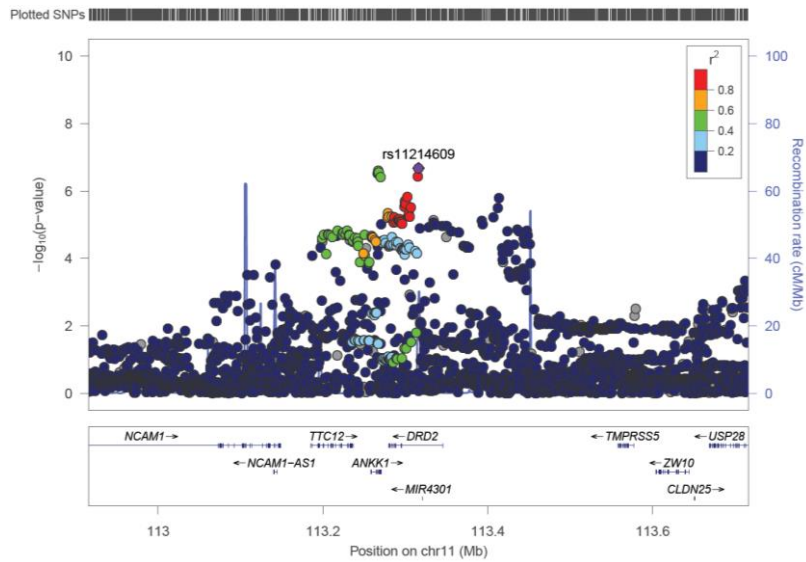

Figure S1e: LocusZoom plot for rs11214609

**Fig. S1. LocusZoom plots for lead SNPs from GWAS on alcohol phenotype in the entire cohort.**

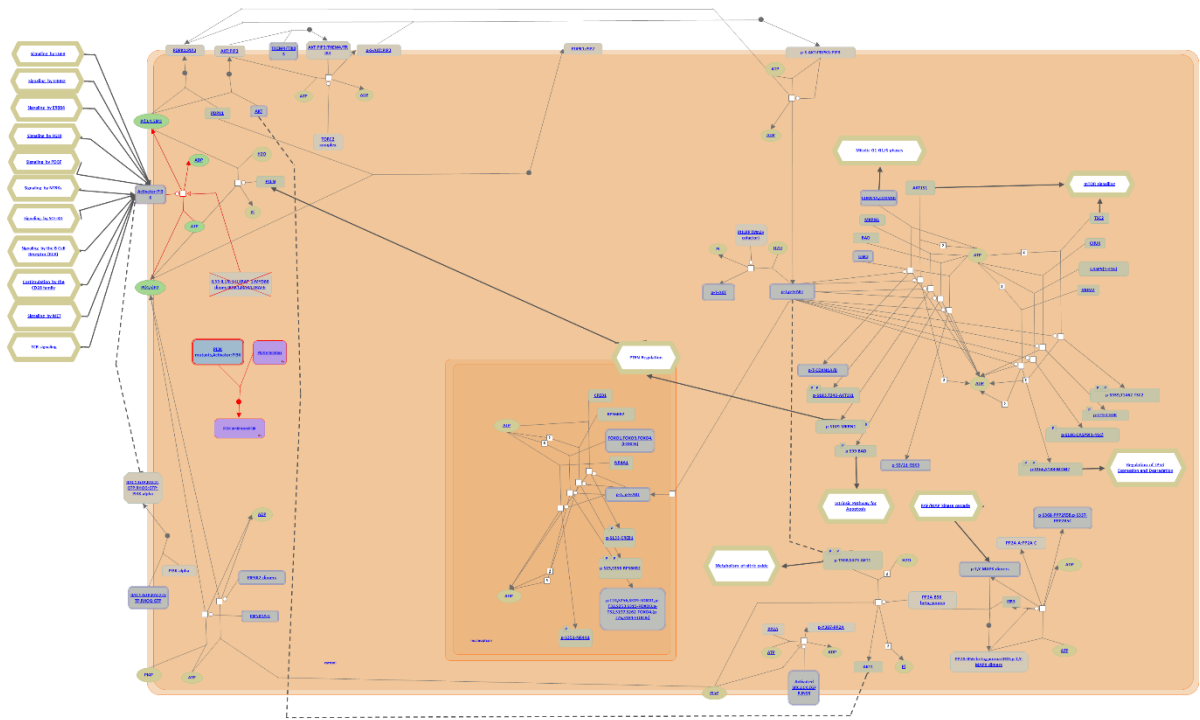

**Fig. S2. Constitutive signaling by aberrant PI3K in cancer.**

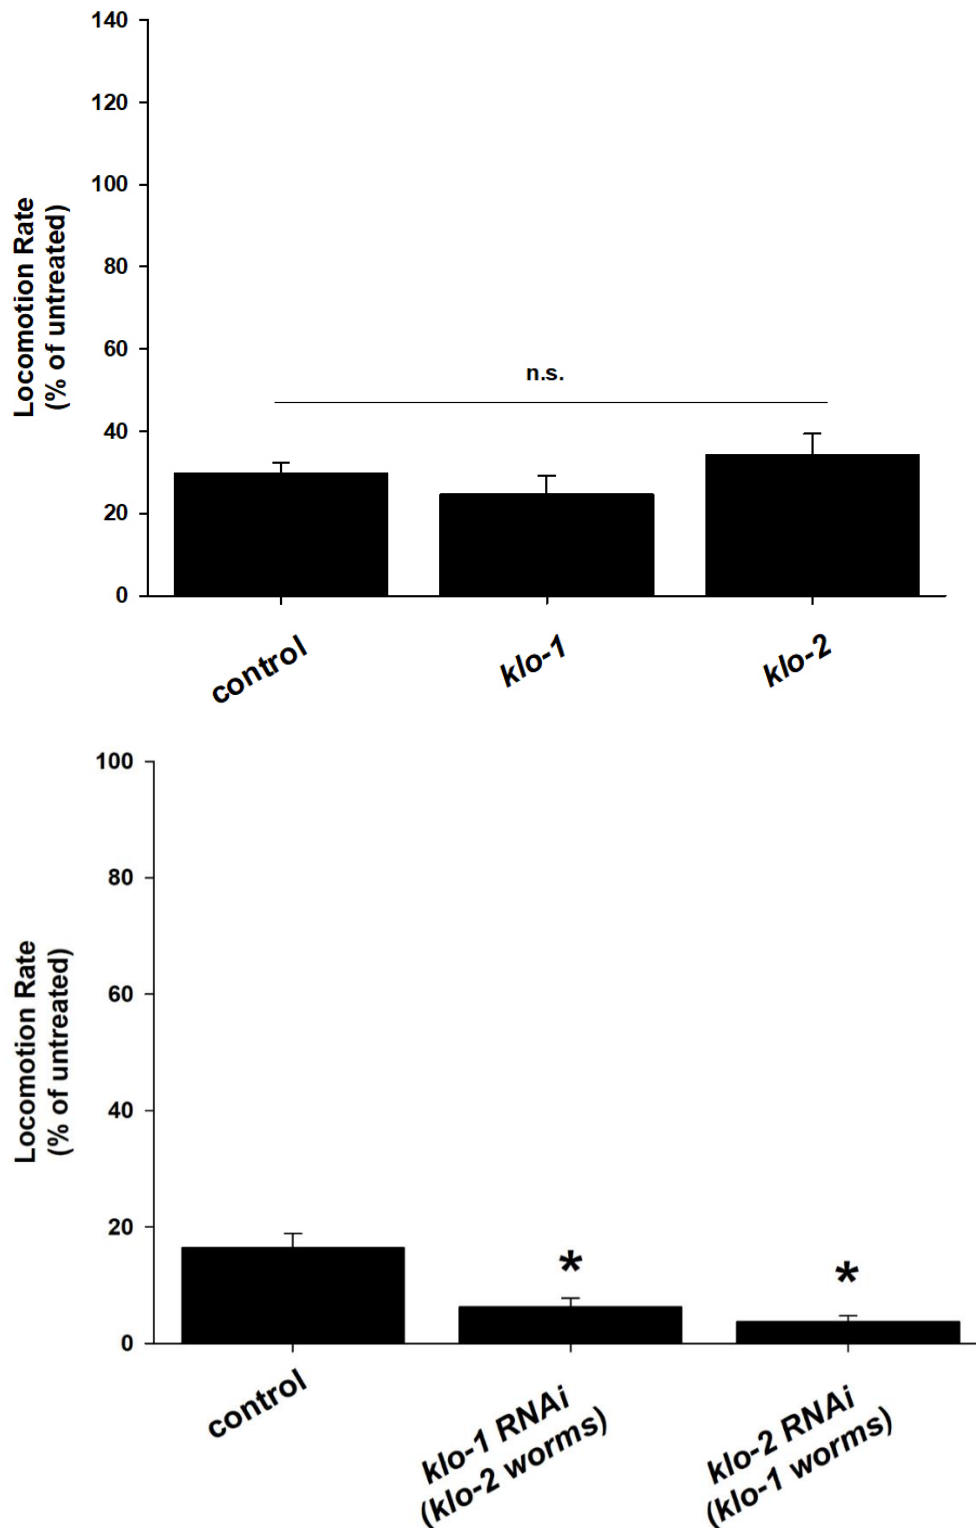

**Fig. S3. Individual *C. elegans*  $\beta$ -Klotho genes outcomes.** Individual *C. elegans*  $\beta$ -Klotho genes outcomes: **A)** Individual *C. elegans* Beta klotho genes do not alter alcohol phenotypes. In comparison to controls (Bristol N2), *loss-of-function* mutations in *klo-1* or *klo-2* genes do not affect the locomotion rate of worms treated with ethanol. Results are presented normalised to locomotion of untreated worms (basal locomotion rate:  $99.03 \pm 1.47$  (Bristol N2 controls),  $98.4 \pm 2.89$  (*klo-1*),  $113.2 \pm 2.12$  (*klo-2*)); **B)** RNAi of individual *C. elegans* Beta klotho genes. RNAi knockdown of worm beta klotho genes in the *loss-of-function* mutant strain of the other worm beta klotho gene. Results are presented as locomotion of worms treated with ethanol normalised to untreated worms (basal locomotion rate:  $87.63 \pm 21.6$  (empty vector control),  $111.10 \pm 3.15$  (*klo-1* RNAi in *klo-2* worms),  $117.03 \pm 3.30$  (*klo-2* RNAi in *klo-1* worms)).
